# Supplementary material for: Selective photocatalytic oxidation of cyclohexene coupled with hydrogen evolution from water splitting over Ni/NiO/CdS and mechanism insight
Source: Royal Society of Chemistry journal article supplement (doi:10.1039/d2cy00674j), 2022-01-01
Supplement: d2cy00674j1.pdf [file d2cy00674j1.pdf]

## Supporting Information

### Selective photocatalytic oxidation of cyclohexene coupled with hydrogen evolution from water splitting over Ni/NiO/CdS and mechanism insight

Ying Zhang<sup>a,b</sup>, Ziran Liu<sup>a</sup>, Changyan Guo<sup>a,\*</sup>, Cheng Guo<sup>a</sup>, Yi Lu<sup>b,\*</sup>, Jide Wang<sup>a,\*</sup>

<sup>a</sup> Key Laboratory of Oil and Gas Fine Chemicals, Ministry of Education & Xinjiang  
Uyghur Autonomous Region, School of chemical engineering and technology, Xinjiang  
University, Urumqi, 830046, China

<sup>b</sup> Xinjiang Uyghur Autonomous Region Product Quality Supervision and Inspection  
Institute, Urumqi, 830011, China

**\*Corresponding author.**

E-mail: [gcyslw@xju.edu.cn](mailto:gcyslw@xju.edu.cn) (Changyan Guo).

E-mail: [luyi\\_xjzjy@163.com](mailto:luyi_xjzjy@163.com) (Yi Lu).

E-mail: [awangjd@sina.cn](mailto:awangjd@sina.cn) (Jide Wang)

## Content

|                                                                                                                                                                                                                                                                                                                                                                                                                                        |   |
|----------------------------------------------------------------------------------------------------------------------------------------------------------------------------------------------------------------------------------------------------------------------------------------------------------------------------------------------------------------------------------------------------------------------------------------|---|
| Figure S1. EDX spectrum of the synthesized Ni/NiO/CdS composite. ....                                                                                                                                                                                                                                                                                                                                                                  | 1 |
| Figure S2. Time-dependent H <sub>2</sub> evolution (a) in different ratios (v/v) of water and MeCN as reaction solvent (MeCN/H <sub>2</sub> O <sup>a</sup> : 1/9, MeCN/H <sub>2</sub> O <sup>b</sup> : 3/7, MeCN/H <sub>2</sub> O <sup>c</sup> : 5/5); (b) Radical capture experiment for photocatalytic oxidation of cyclohexene; (c) photocatalytic oxidation cyclohexene, cyclohex-2-en-1-ol and cyclohexane-1,2-diol. ....         | 1 |
| Figure S3. (a) Band gap energies of Ni/NiO; (b) UPS spectrum of Ni/NiO. ....                                                                                                                                                                                                                                                                                                                                                           | 2 |
| Figure S4. UPS spectrum of CdS. ....                                                                                                                                                                                                                                                                                                                                                                                                   | 2 |
| Figure S5. Photocatalytic recycling performance. ....                                                                                                                                                                                                                                                                                                                                                                                  | 2 |
| Figure S6. The reactor system and setup. ....                                                                                                                                                                                                                                                                                                                                                                                          | 3 |
| Figure S7. (a) Gas chromatogram of photocatalytic oxidation of cyclohexene products distribution under Ar; (b) gas chromatogram of photocatalytic oxidation of cyclohexene products distribution under O <sub>2</sub> ; (c) liquid chromatogram of photocatalytic oxidation of cyclohexene products distribution under Ar; (d) gas chromatogram of photocatalytic oxidation of cyclohex-2-en-1-ol products distribution under Ar. .... | 3 |
| Table S1. The content of each element in the composite catalyst by EDS results. ....                                                                                                                                                                                                                                                                                                                                                   | 4 |
| Table S2. Under different solvent conditions, the cyclohexene conversion rate. ....                                                                                                                                                                                                                                                                                                                                                    | 4 |
| Table S3. Radical capture reaction cyclohexene conversion rate and product yield under argon conditions. ....                                                                                                                                                                                                                                                                                                                          | 4 |
| Table S4 Comparison with the reported results for oxidation of cyclohexene coupled. ....                                                                                                                                                                                                                                                                                                                                               | 5 |
| Table S5 Cyclohexene conversion rate and product yield under argon atmosphere and oxygen atmosphere. ....                                                                                                                                                                                                                                                                                                                              | 5 |
| Table S6. The content of Ni and Cd in the catalysts. ....                                                                                                                                                                                                                                                                                                                                                                              | 5 |
| Table S7. Cyclohexene conversion rate and product yield in different time. ....                                                                                                                                                                                                                                                                                                                                                        | 6 |
| Table S8. Photocatalytic reaction products and yield. ....                                                                                                                                                                                                                                                                                                                                                                             | 6 |
| Table S9. GC Method validation of linearity in five sample matrices. ....                                                                                                                                                                                                                                                                                                                                                              | 6 |
| Table S10. Radical capture reaction cyclohexene conversion rate and product yield under oxygen conditions. ....                                                                                                                                                                                                                                                                                                                        | 7 |
| Scheme S1. Under oxygen atmosphere, proposed potential mechanism of the photocatalytic oxidation cyclohexene by Ni/NiO/CdS. ....                                                                                                                                                                                                                                                                                                       | 7 |

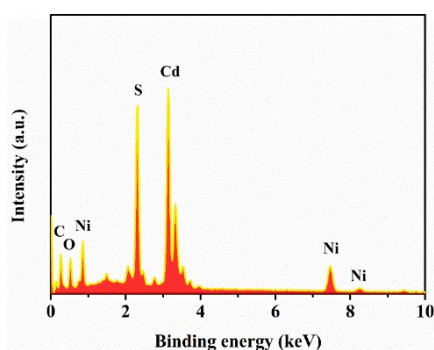

**Figure S1.** EDX spectrum of the synthesized Ni/NiO/CdS composite.

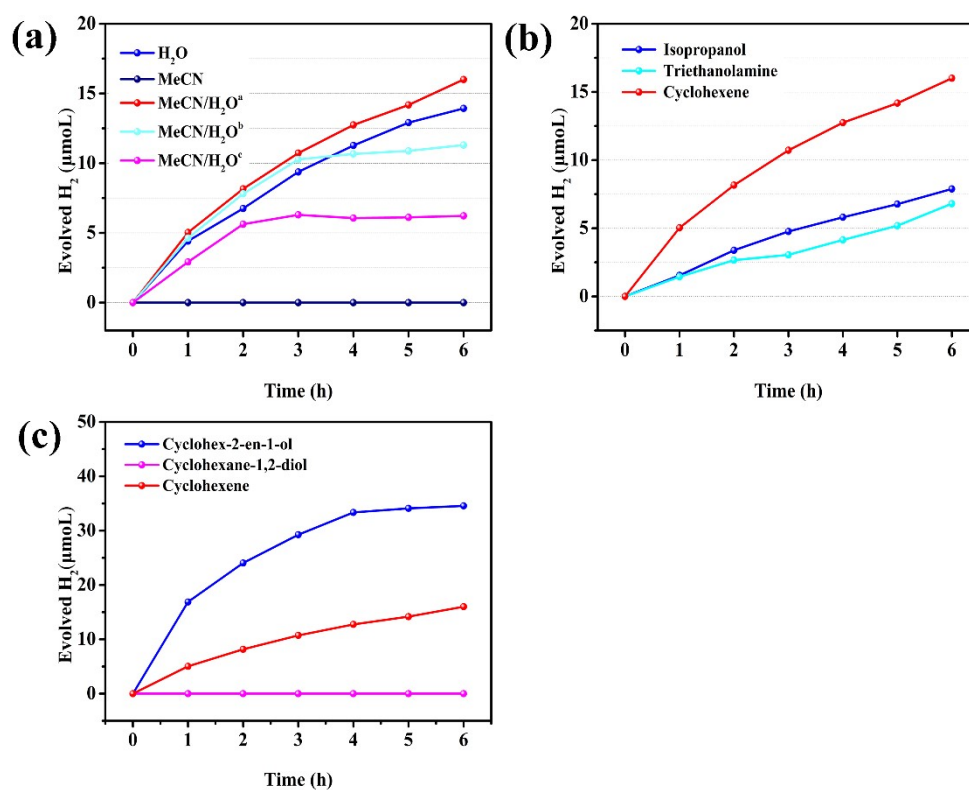

**Figure S2.** Time-dependent H<sub>2</sub> evolution (a) in different ratios (v/v) of water and MeCN as reaction solvent (MeCN/H<sub>2</sub>O<sup>a</sup>: 1/9, MeCN/H<sub>2</sub>O<sup>b</sup>: 3/7, MeCN/H<sub>2</sub>O<sup>c</sup>: 5/5); (b) Radical capture experiment for photocatalytic oxidation of cyclohexene; (c) photocatalytic oxidation cyclohexene, cyclohex-2-en-1-ol and cyclohexane-1,2-diol.

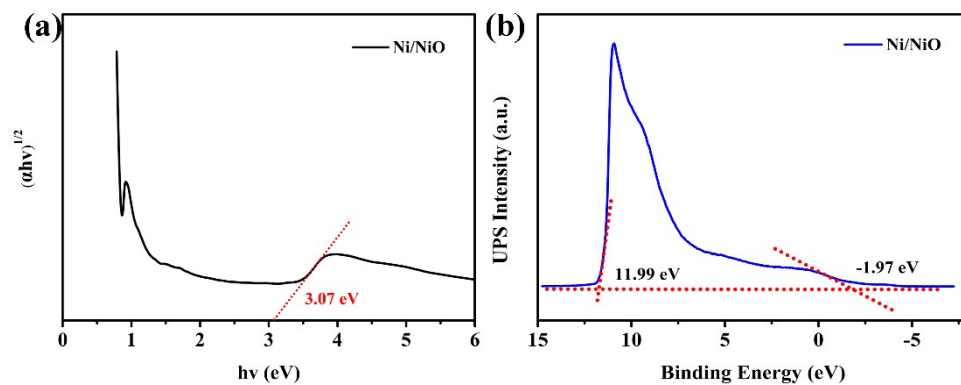

**Figure S3.** (a) Band gap energies of Ni/NiO; (b) UPS spectrum of Ni/NiO.

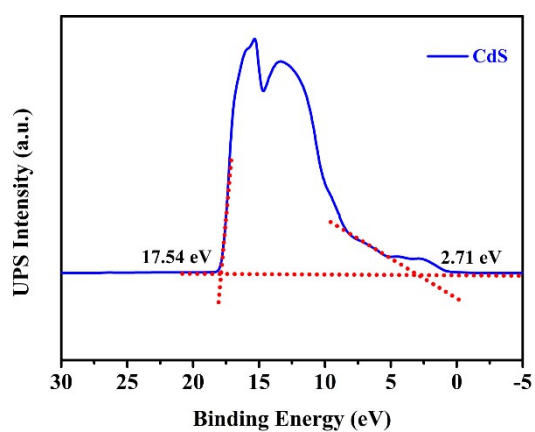

**Figure S4.** UPS spectrum of CdS.

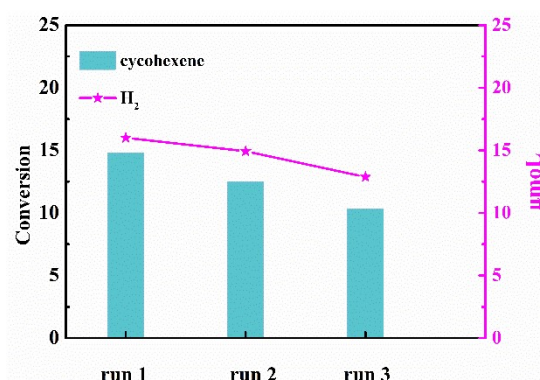

**Figure S5.** Photocatalytic recycling performance.

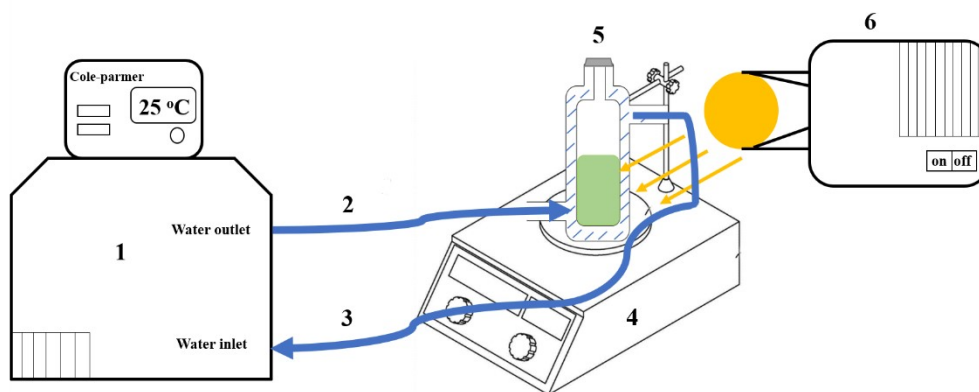

**The reactor system and setup**

Legend: 1. Cold recirculating cooler (Cole-parmer, 12101-36, USA); 2. Condensate pipe (water outlet); 3. Condensate pipe (water inlet); 4. Magnetic stirrer (ChangZhou yuexin, 78-1); 5. Photoreaction flask; 6. Xenon lamp (Perfectlight, PLS-SXE 300)

**Figure S6.** The reactor system and setup.

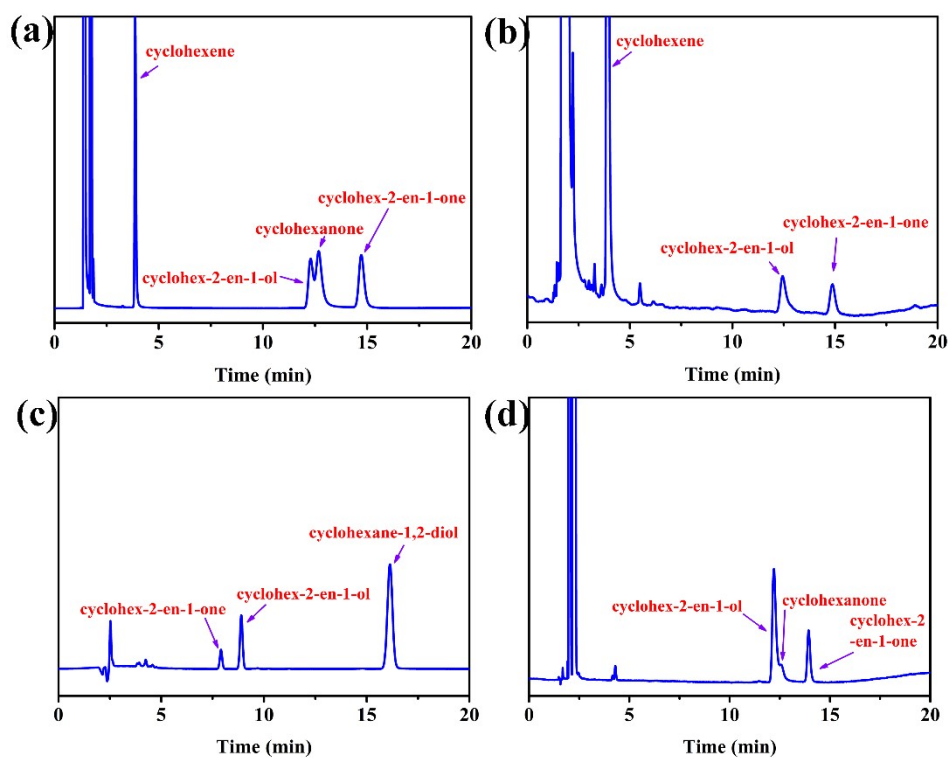

**Figure S7.** (a) Gas chromatogram of photocatalytic oxidation of cyclohexene products distribution under Ar; (b) gas chromatogram of photocatalytic oxidation of cyclohexene products distribution under O<sub>2</sub>; (c) liquid chromatogram of photocatalytic oxidation of cyclohexene products distribution under Ar; (d) gas chromatogram of photocatalytic oxidation of cyclohex-2-en-1-ol products distribution under Ar.

**Table S1.** The content of each element in the composite catalyst by EDS results.

| Elem | Mass% | M      | Atom% |
|------|-------|--------|-------|
| C    | 32.37 | 12.011 | 0.60  |
| O    | 17.14 | 15.999 | 0.24  |
| S    | 9.66  | 32.059 | 0.07  |
| Ni   | 7.97  | 58.693 | 0.03  |
| Cd   | 32.86 | 112.41 | 0.06  |

**Table S2.** Under different solvent conditions, the cyclohexene conversion rate.

| Solvent                             | Solvent ratio<br>(MeCN/H <sub>2</sub> O, v/v) | Conv. (%) | H <sub>2</sub> rate (μmol) |
|-------------------------------------|-----------------------------------------------|-----------|----------------------------|
| H <sub>2</sub> O                    | 10                                            | 3.4       | 13.9                       |
| MeCN                                | 10                                            | 0         | 0                          |
| MeCN/H <sub>2</sub> O <sup>a*</sup> | 1/9                                           | 14.8      | 16.0                       |
| MeCN/H <sub>2</sub> O <sup>b</sup>  | 3/7                                           | 10.9      | 11.3                       |
| MeCN/H <sub>2</sub> O <sup>c</sup>  | 5/5                                           | 5.3       | 6.2                        |

\*Different ratios (v/v) of water and MeCN as reaction solvent: MeCN/H<sub>2</sub>O<sup>a</sup>: 1/9, MeCN/H<sub>2</sub>O<sup>b</sup>: 3/7, MeCN/H<sub>2</sub>O<sup>c</sup>: 5/5.

**Table S3.** Radical capture reaction cyclohexene conversion rate and product yield under argon conditions.

| Compound        | Conv. (%) | Selectivity (%)    |                     |               |                      | H <sub>2</sub> rate (μmol) |
|-----------------|-----------|--------------------|---------------------|---------------|----------------------|----------------------------|
|                 |           | cyclohex-2-en-1-ol | cyclohex-2-en-1-one | cyclohexanone | cyclohexane-1,2-diol |                            |
| Blank           | 14.8      | 2.6                | 8.2                 | 1.7           | 2.1                  | 16.0                       |
| Triethanolamine | 1.7       | 0.5                | 0.7                 | 0.3           | 0.1                  | 6.8                        |
| Isopropanol     | 2.1       | 0.6                | 0.9                 | 0.2           | 0.3                  | 7.9                        |

**Table S4** Comparison with the reported results for oxidation of cyclohexene coupled.

| Catalysts                             | Light source | Solvent                   | Oxidation conditions          | Tem<br>(°C) | Tim<br>e<br>(h) | Conv<br>(%) | Products<br>* | Ref.         |
|---------------------------------------|--------------|---------------------------|-------------------------------|-------------|-----------------|-------------|---------------|--------------|
| UiO-66                                | none         | MeCN                      | H <sub>2</sub> O <sub>2</sub> | 50          | 1               | 31          | C, D          | <sup>1</sup> |
| Fe-Co-g-C <sub>3</sub> N <sub>4</sub> | none         | H <sub>2</sub> O          | O <sub>2</sub> (4 MP)         | 90          | 5               | 27.6        | A, B, C, D    | <sup>2</sup> |
| CoMo                                  | 420-500 nm   | 4-ethyltoluene            | O <sub>2</sub> (1 atm)        | 50          | 12              | 69.8        | A, B, C, D    | <sup>3</sup> |
| Fe-TiO <sub>2</sub>                   | 400 W/D      | H <sub>2</sub> O          | Air (1 bar)                   | 37          | 3               | /           | A, B, C       | <sup>4</sup> |
| TiO <sub>2</sub>                      | λ>280 nm     | MeCN                      | O <sub>2</sub> (1 atm)        | 40          | 3               | 27          | A, B, C       | <sup>5</sup> |
| Degussa P25 TO <sub>2</sub>           | λ>340 nm     | MeCN                      | O <sub>2</sub>                | RT.         | 8               | /           | C             | <sup>6</sup> |
| Ni/NiO/Cd S                           | λ>420 nm     | MeCN/H <sub>2</sub> O=1/9 | none                          | 25          | 6               | 14.8        | A, B, D, E    | This work    |
| UiO-66                                | none         | MeCN                      | H <sub>2</sub> O <sub>2</sub> | 50          | 1               | 31          | C, D          |              |

Products\*: in scheme 1 and scheme 2

**Table S5** Cyclohexene conversion rate and product yield under argon atmosphere and oxygen atmosphere.

| Oxidation conditions | Solvent (v/v)             | Conv. (%) | Yield (%) |      |       |     | H <sub>2</sub> (μmol) | Reaction conditions: |
|----------------------|---------------------------|-----------|-----------|------|-------|-----|-----------------------|----------------------|
|                      |                           |           | A         | B    | E     | D   |                       |                      |
| Argon                | MeCN/H <sub>2</sub> O=1/9 | 14.8      | 2.6       | 8.2  | 1.7   | 2.1 | 16.0                  |                      |
| Argon*               | MeCN/H <sub>2</sub> O=1/9 | 0         | 0         | 0    | 0     | 0   | trace                 |                      |
| Oxygen               | MeCN/H <sub>2</sub> O=1/9 | 11.9      | 0.4       | 11.3 | trace | 0.2 | trace                 |                      |

cyclohexene (10 mM), Photocatalyst (10 mg), Solvent (10 mL), visible light irradiation (λ>420 nm, 6 h). Argon\*: no reactants (cyclohexene).

**Table S6.** The content of Ni and Cd in the catalysts.

| Type of catalyst | Ni constant (%) <sup>a</sup> | Cd constant (%) <sup>b</sup> |
|------------------|------------------------------|------------------------------|
| Ni/NiO/CdS_0.5   | 1.26                         | 5.33                         |
| Ni/NiO/CdS_1     | 2.34                         | 4.75                         |
| Ni/NiO/CdS_2     | 3.94                         | 4.25                         |
| Ni/NiO/CdS_4     | 5.33                         | 3.31                         |
| Ni/NiO/CdS_8     | 5.61                         | 2.40                         |

a: Percentage of Ni element content, b: Percentage of Cd element content

**Table S7.** Cyclohexene conversion rate and product yield in different time.

| Time (h) | Conv. (%) | Selectivity (%)    |                     |               |                      | H <sub>2</sub> rate (μmol) |
|----------|-----------|--------------------|---------------------|---------------|----------------------|----------------------------|
|          |           | cyclohex-2-en-1-ol | cyclohex-2-en-1-one | cyclohexanone | cyclohexane-1,2-diol |                            |
| 0        | 0         | 0                  | 0                   | 0             | 0                    | 0                          |
| 1        | 4.7       | 1.6                | 1.7                 | 0             | 1.2                  | 5.0                        |
| 2        | 8.3       | 2.8                | 3.9                 | 0             | 1.5                  | 8.2                        |
| 3        | 10.5      | 3.1                | 5.4                 | 0             | 1.8                  | 10.7                       |
| 4        | 12.4      | 3.5                | 6.9                 | 0             | 1.9                  | 12.8                       |
| 5        | 13.2      | 2.7                | 7.6                 | 0.8           | 2.0                  | 14.2                       |
| 6        | 14.8      | 2.6                | 8.2                 | 1.7           | 2.1                  | 16.0                       |

**Table S8.** Photocatalytic reaction products and yield.

| Compound             | Conv. (%) | Yield (%)          |                     |               |                      | H <sub>2</sub> rate (μmol) |
|----------------------|-----------|--------------------|---------------------|---------------|----------------------|----------------------------|
|                      |           | cyclohex-2-en-1-ol | cyclohex-2-en-1-one | cyclohexanone | cyclohexane-1,2-diol |                            |
| cyclohexene          | 14.8      | 2.6                | 8.2                 | 1.7           | 2.1                  | 16.0                       |
| cyclohex-2-en-1-ol   | 41.2      | /                  | 24.5                | 16.3          | trace                | 34.5                       |
| cyclohexane-1,2-diol | 0         | trace              | trace               | trace         | /                    | trace                      |

**Table S9.** GC Method validation of linearity in five sample matrices.

| Analytes           | Linear range (μg·mL <sup>-1</sup> ) | Regression equation    | Correlation coefficient (r <sup>2</sup> ) |
|--------------------|-------------------------------------|------------------------|-------------------------------------------|
| cyclohexene        | 10 -1000                            | Y = 1158.35X + 3989.38 | 0.9992                                    |
| cyclohex-2-en-1-ol | 10 -200                             | Y = 899.66X - 2661.63  | 0.9926                                    |



|                     |         |                         |        |
|---------------------|---------|-------------------------|--------|
| cyclohex-2-en-1-one | 10 -200 | $Y = 842.22X + 5615.86$ | 0.9905 |
| cyclohexanone       | 10 -200 | $Y = 658.21X + 3241.70$ | 0.9954 |

**Table S10.** Radical capture reaction cyclohexene conversion rate and product yield under oxygen conditions.

| Entry | Compound     | Conv. (%) | Selectivity (%)    |                     |               |                      | H <sub>2</sub> rate (μmol) |
|-------|--------------|-----------|--------------------|---------------------|---------------|----------------------|----------------------------|
|       |              |           | cyclohex-2-en-1-ol | cyclohex-2-en-1-one | cyclohexanone | cyclohexane-1,2-diol |                            |
| (a)   | Blank        | 11.9      | 0.4                | 11.3                | trace         | 0.2                  | trace                      |
| (b)   | Benzoquinone | 0.5       | trace              | 0.5                 | trace         | trace                | trace                      |
| (c)   | Isopropanol  | 0.2       | trace              | 0.2                 | trace         | trace                | trace                      |

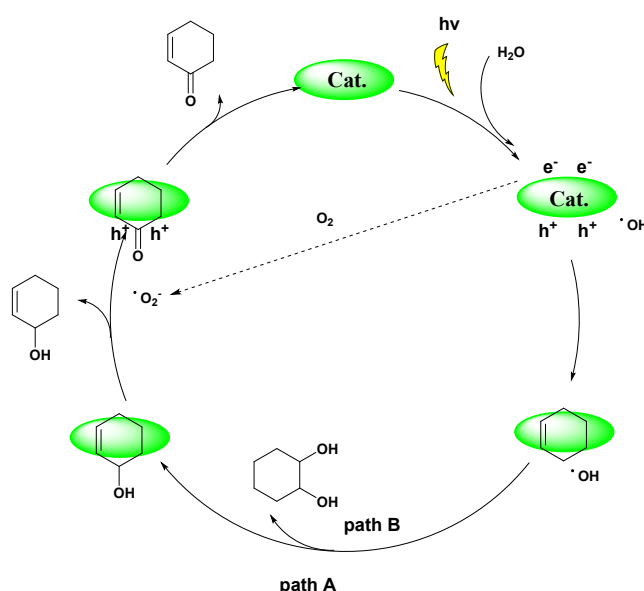

**Scheme S1.** Under oxygen atmosphere, proposed potential mechanism of the photocatalytic oxidation cyclohexene by Ni/NiO/CdS.

## References

1. N. V. Maksimchuk, J. S. Lee, M. V. Solovyeva, K. H. Cho, A. N. Shmakov, Y. A. Chesalov, J.-S. Chang and O. A. Kholdeeva, *ACS Catal.*, 2019, **9**, 9699-9704.
2. D. Yang, T. Jiang, T. Wu, P. Zhang, H. Han and B. Han, *Catal. Sci. Technol.*, 2016, **6**, 193-200.
3. X. Shi, Z. Shi, G. Niu, C. Si, Q. Han and J. Zhang, *Catal. Lett.*, 2019, **149**, 3048-3057.
4. A. Henríquez, H. D. Mansilla, A. Martínez-de la Cruz, L. Cornejo-Ponce, E. Schott and D. Contreras, *Catalysts*, 2020, **10**, 1448-1462.

5. Y. Shiraishi, M. Morishita and T. Hirai, *Chem. Commun.*, 2005, 5977-5979.
6. S. Ouidri, C. Guillard, V. Caps and H. Khalaf, *Appl. Clay Sci.*, 2010, **48**, 431-437.
